# Supplementary material for: Cellular heterogeneity of Schistosoma japonicum egg-induced hepatic granulomas in mice: insights into granuloma formation and evolution
Source: Research Square preprint supplement (doi:10.21203/rs.3.rs-8508078/v1), 2026-01-14
Supplement: Supplementary file 1 [file 803ecd3d5065c426a3399377.docx]

**Supplementary Figures**

**
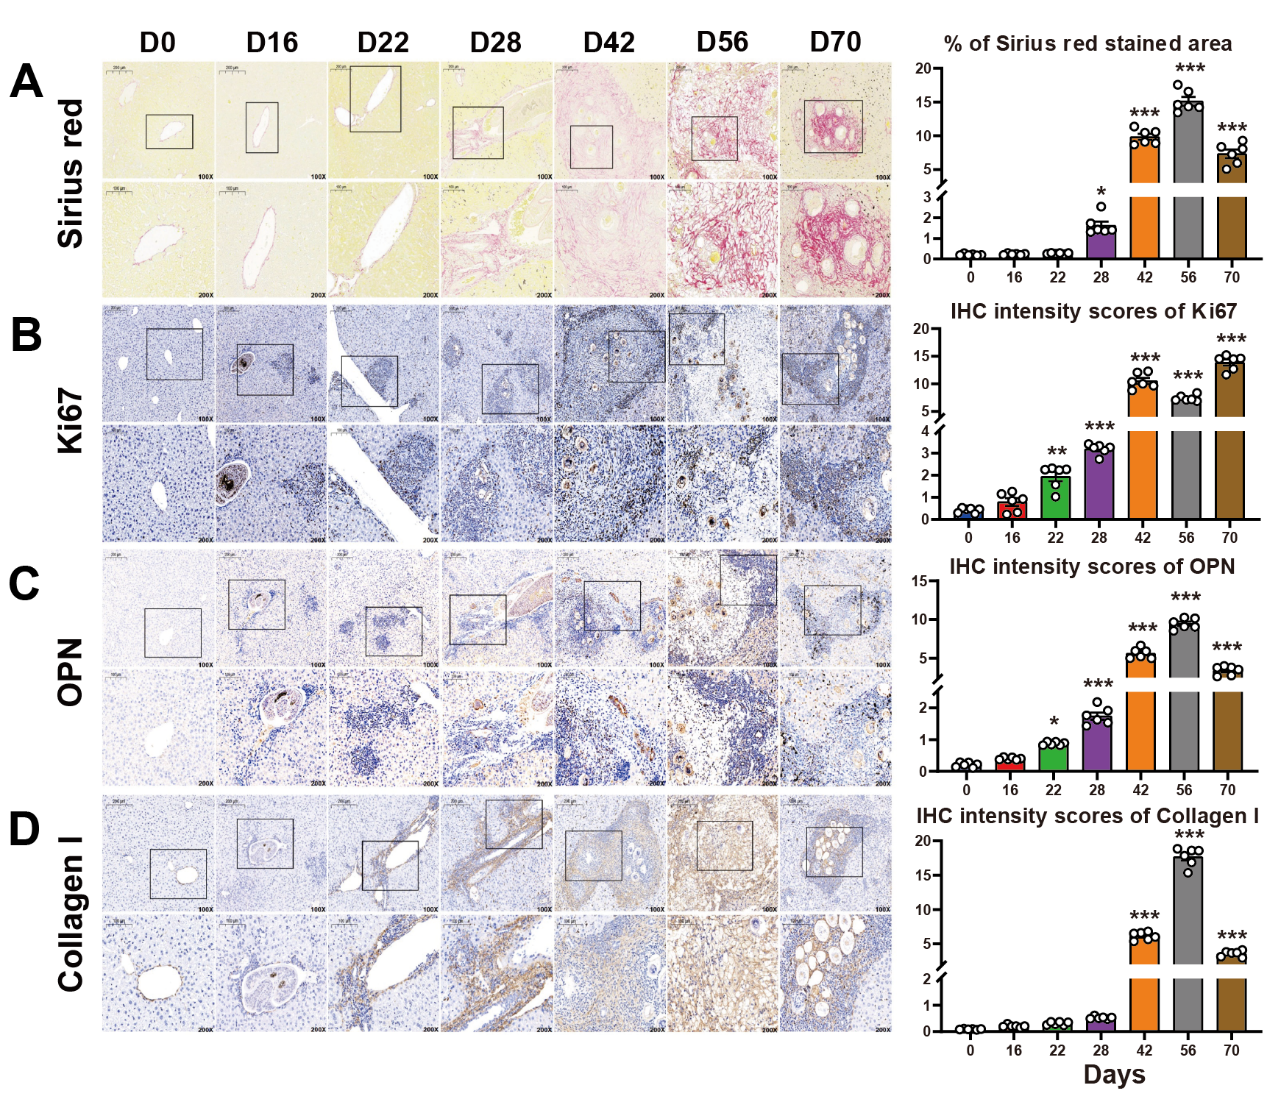
**

**Figure S1 Infection with *S. japonicum* can lead to hepatic fibrosis in mice.** **(A)** Sirius red staining showed collagen depositions of the liver in mice infected with *S. japonicum*. **(B-D)** The expression of Ki67, Osteopontin (OPN), and collagen I in mouse livers infected with *S. japonicum*. The highlighted area indicates the positive cells. The positive areas in the livers of non-infected and infected mice were quantitated by Image J. The values were expressed as mean ± SEM. Compared with indicated groups, **P* < 0.05, ***P* < 0.01, ****P* < 0.001.

**
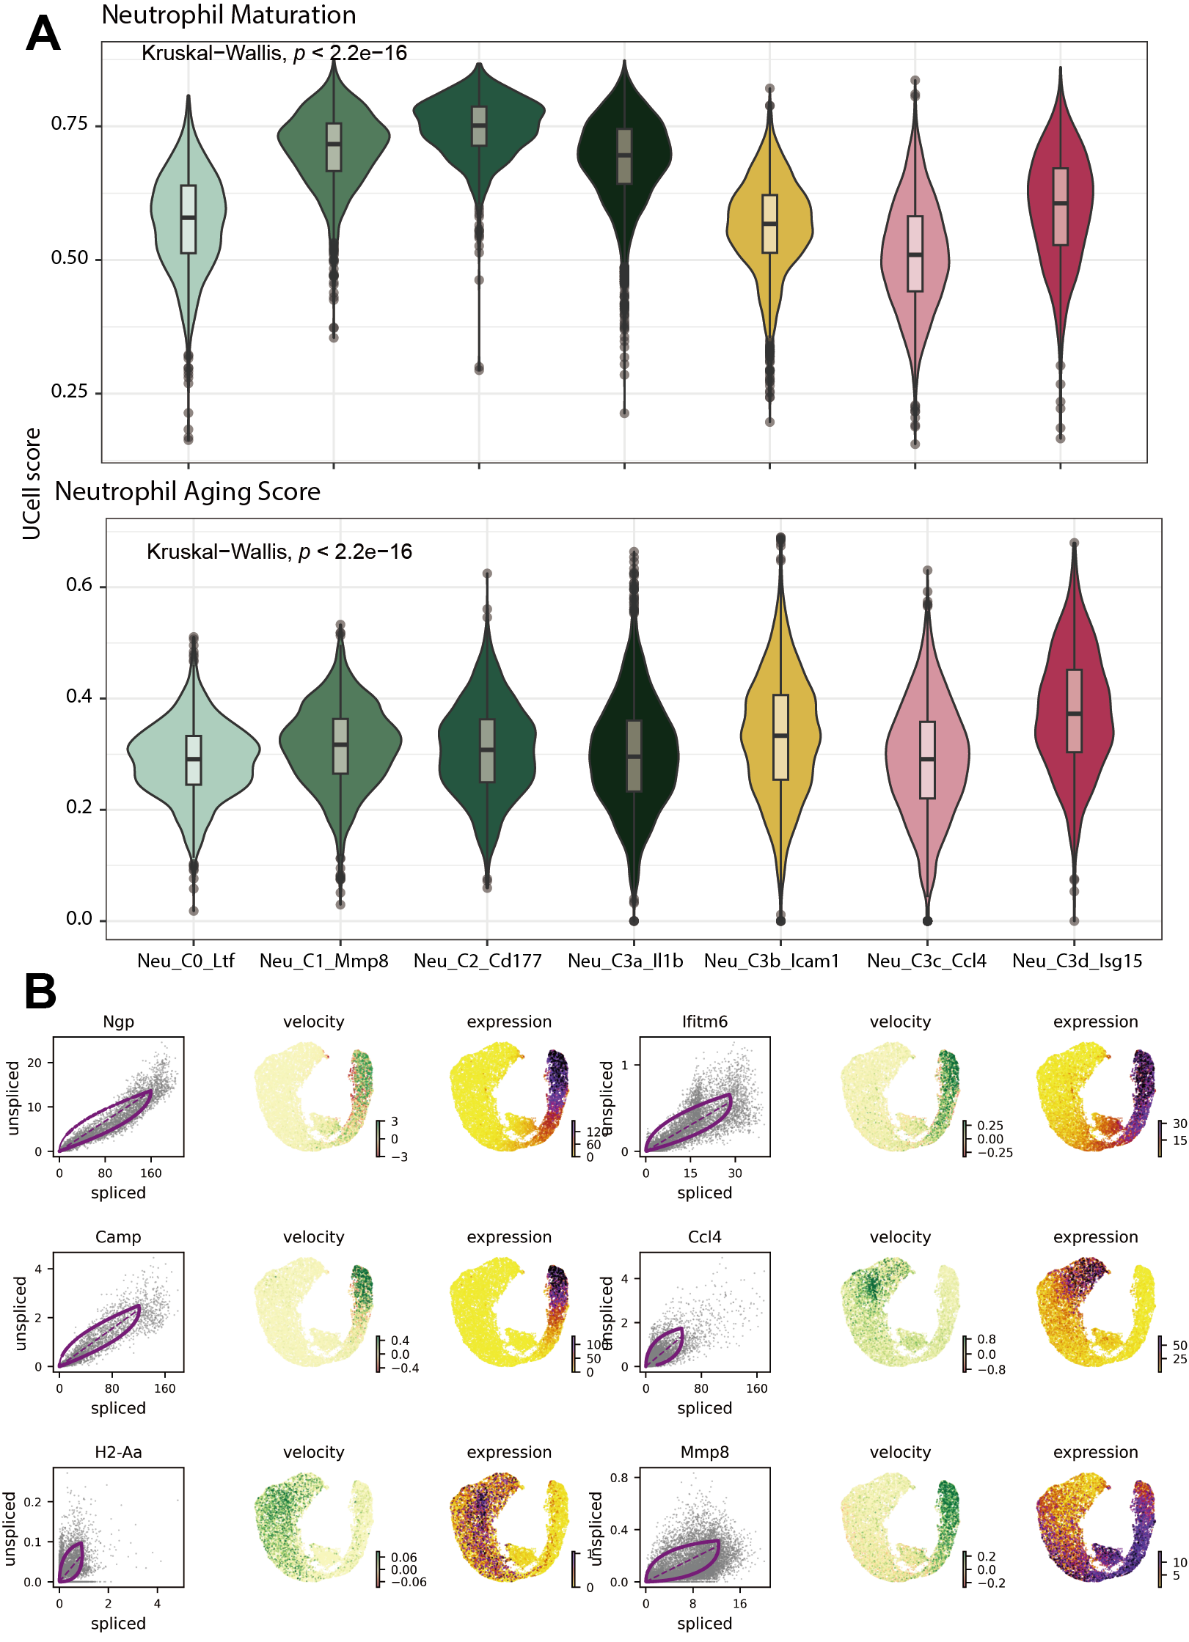
**

**Figure S2 Directional changes of individual cells and intercellular transition processes within** **neutrophil subsets.** **(A)** Score of neutrophil maturation and degree of aging. **(B)** Velocity visualization of the top 6 driver genes.

**
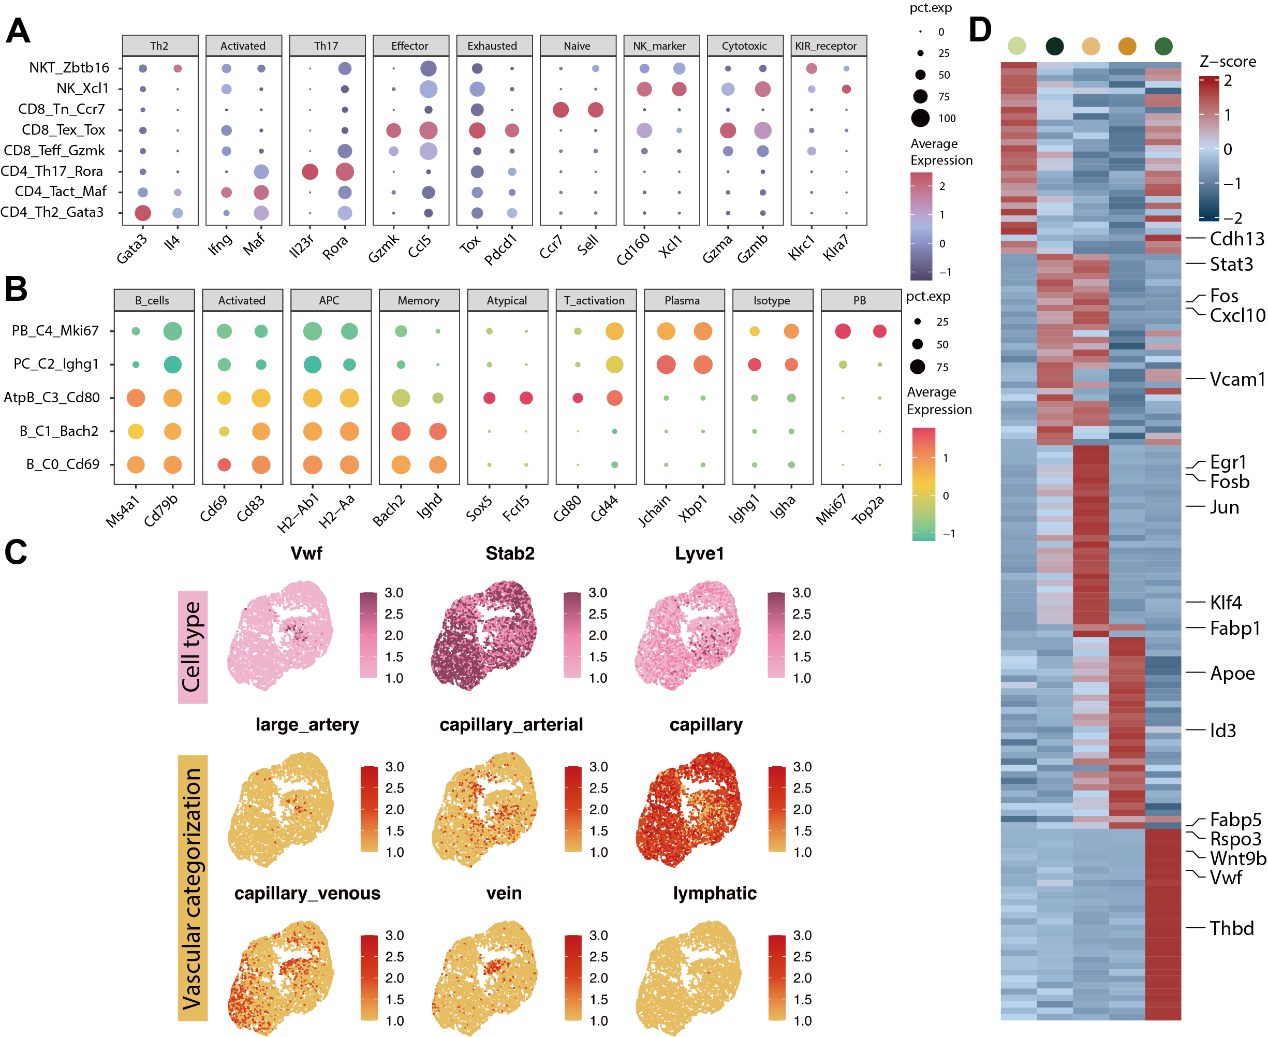
**

**Figure S3 Dynamic alterations in T cells, B cells, and** **endothelial cells during the progression of liver fibrosis in *S. japonicum*-infected mice. (A)** Bubble plots of T cells for the top 2 marker genes expressed for each cluster. **(B)** Bubble plots of B cells for the top 2 marker genes expressed for each cluster. **(C)** Subsets of endothelial cells related to the formation of vascular types. **(D)** Gene expression heatmap (marker gene expressed) in endothelial cells subsets.

**
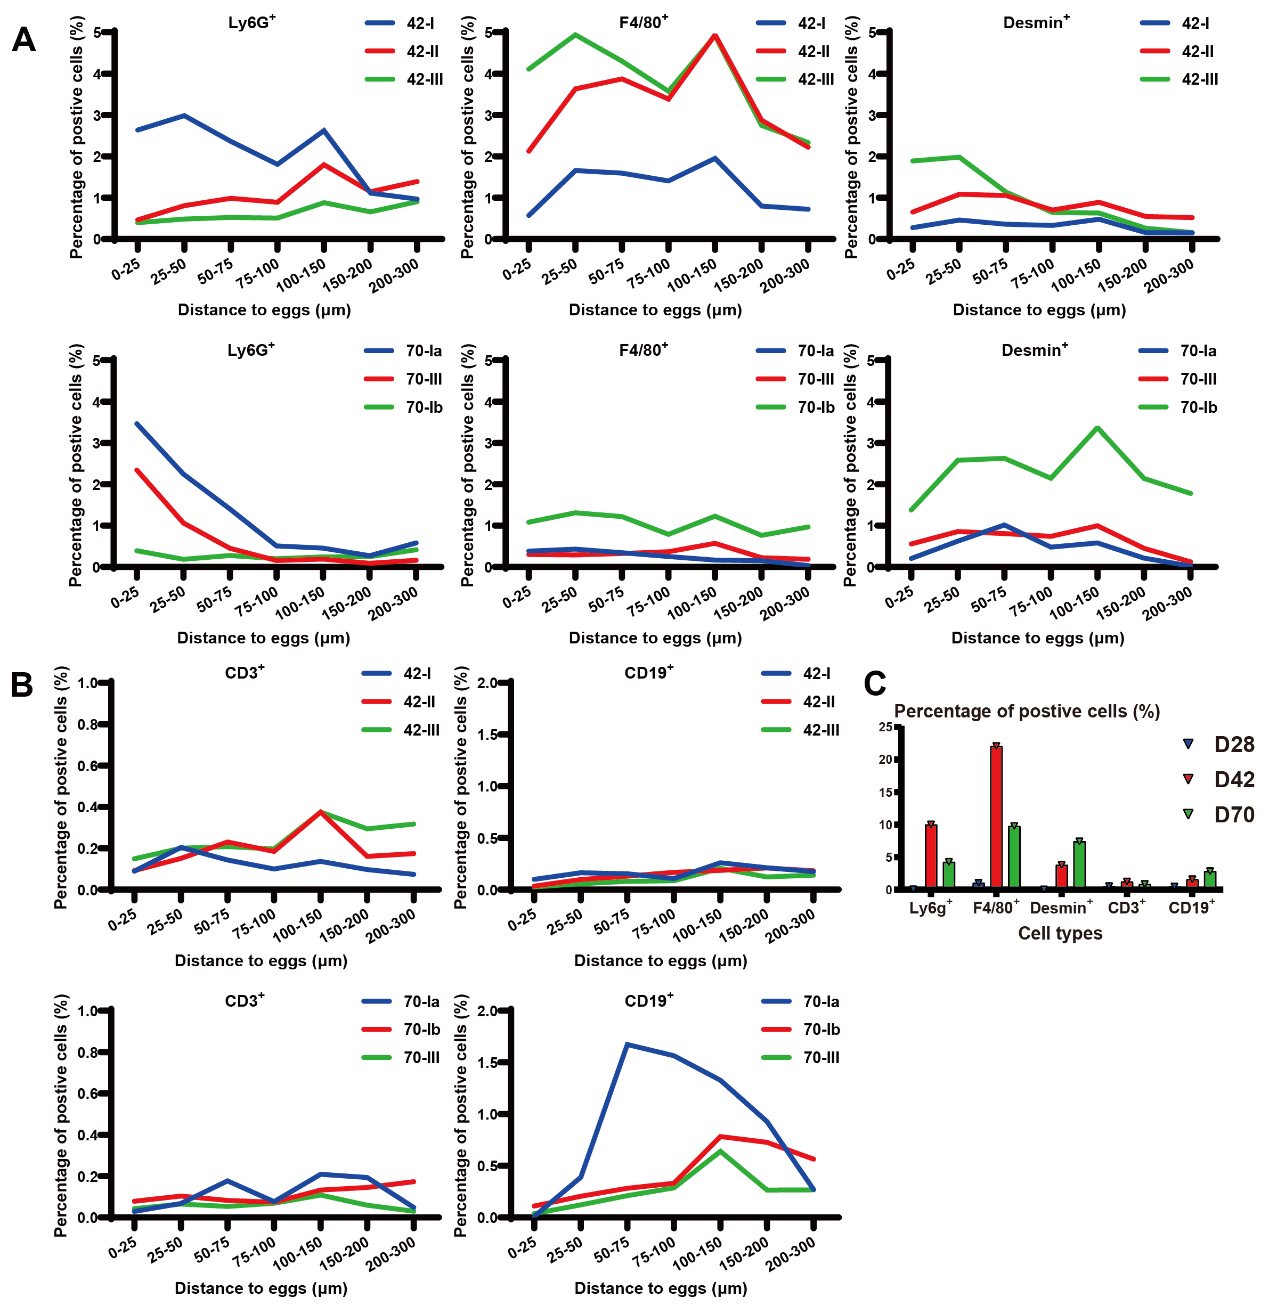
**

**Figure S4 The proportion of Ly6g+, F4/80+, Desmin+, CD3+, and CD19+ cells at different distances from eggs.** (A) Ly6g+, F4/80+, and Desmin+ cells at 42 and 70 d.p.i. (B) CD3+ and CD19+ cells at 42 and 70 d.p.i. (C) The proportions of Ly6g+, F4/80+, Desmin+, CD3+, and CD19+ cells in the liver tissues of mice at 28, 42, and 70 d.p.i.

**
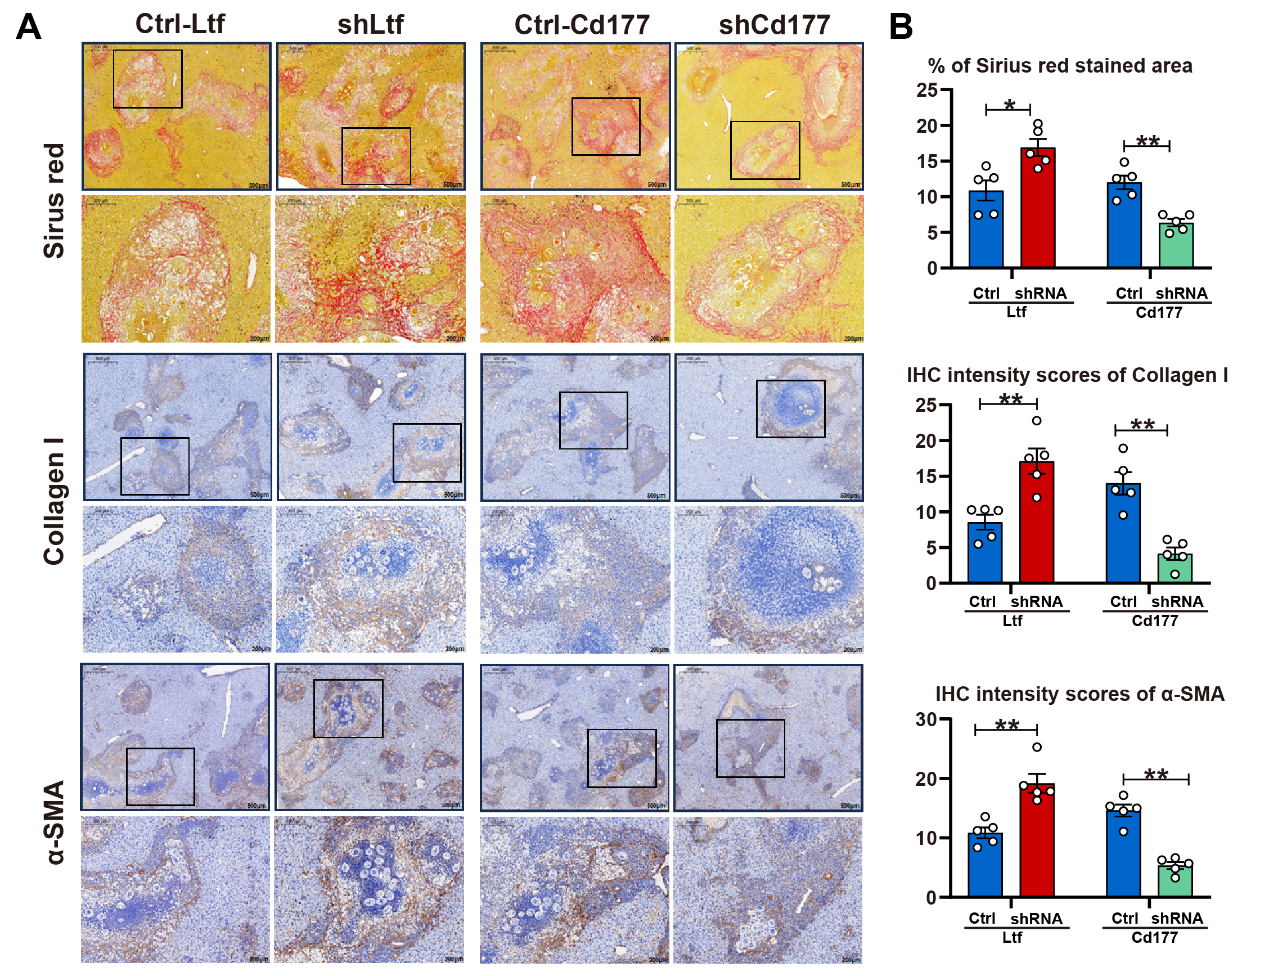
**

**Figure S5 Assessment of fibrosis in *S. japonicum*-infected mice following knockdown of *Ltf* and *Cd177*. (A)** Representative images of Sirius red staining, collagen I, and α-SMA immunohistochemistry. **(B)** The positive areas in the liver of control and shRNA group were quantitated by Image J (N=5 per group). The values were expressed as mean ± SEM. **P* < 0.05, ***P* < 0.01, ****P* < 0.001 when compared with control groups.
